# Supplementary material for: Tolerogenic Plasmacytoid Dendritic Cells Control Paracoccidioides brasiliensis Infection by Inducting Regulatory T Cells in an IDO-Dependent Manner
Source: PubMed Central journal article supplement (PMC5215616; doi:10.1371/journal.ppat.1006115), 2016-12-19
Supplement: ppat.1006115.s002.pdf [file ppat.1006115.s002.pdf]

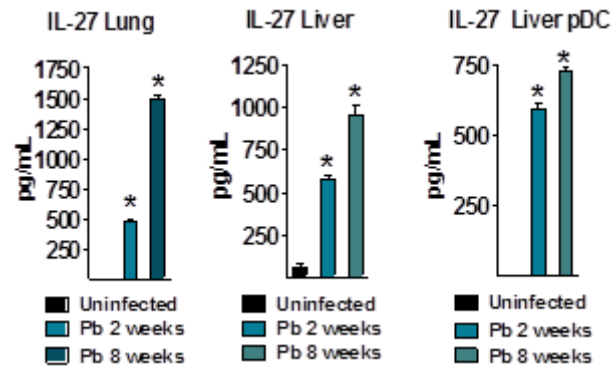

**S2 Fig. *P. brasiliensis* infection increases the levels of hepatic IL-27 and the production of IL-27 by isolated liver pDCs.** IL-27 quantitation by ELISA in liver homogenates from uninfected and infected mice at weeks 2 and 8 post-infection. pDCs were isolated from uninfected and infected mice, cultivated *ex vivo* ( $3 \times 10^5$  cells/well, 18 h) and supernatants analyzed for the presence of IL-27. Bars show mean  $\pm$  SD from at least four mice per group and are representative of two independent experiments (\* $p < 0.05$ ).
