# Supplementary material for: Tolerogenic Plasmacytoid Dendritic Cells Control Paracoccidioides brasiliensis Infection by Inducting Regulatory T Cells in an IDO-Dependent Manner
Source: PubMed Central journal article supplement (PMC5215616; doi:10.1371/journal.ppat.1006115), 2016-12-19
Supplement: ppat.1006115.s003.pdf [file ppat.1006115.s003.pdf]

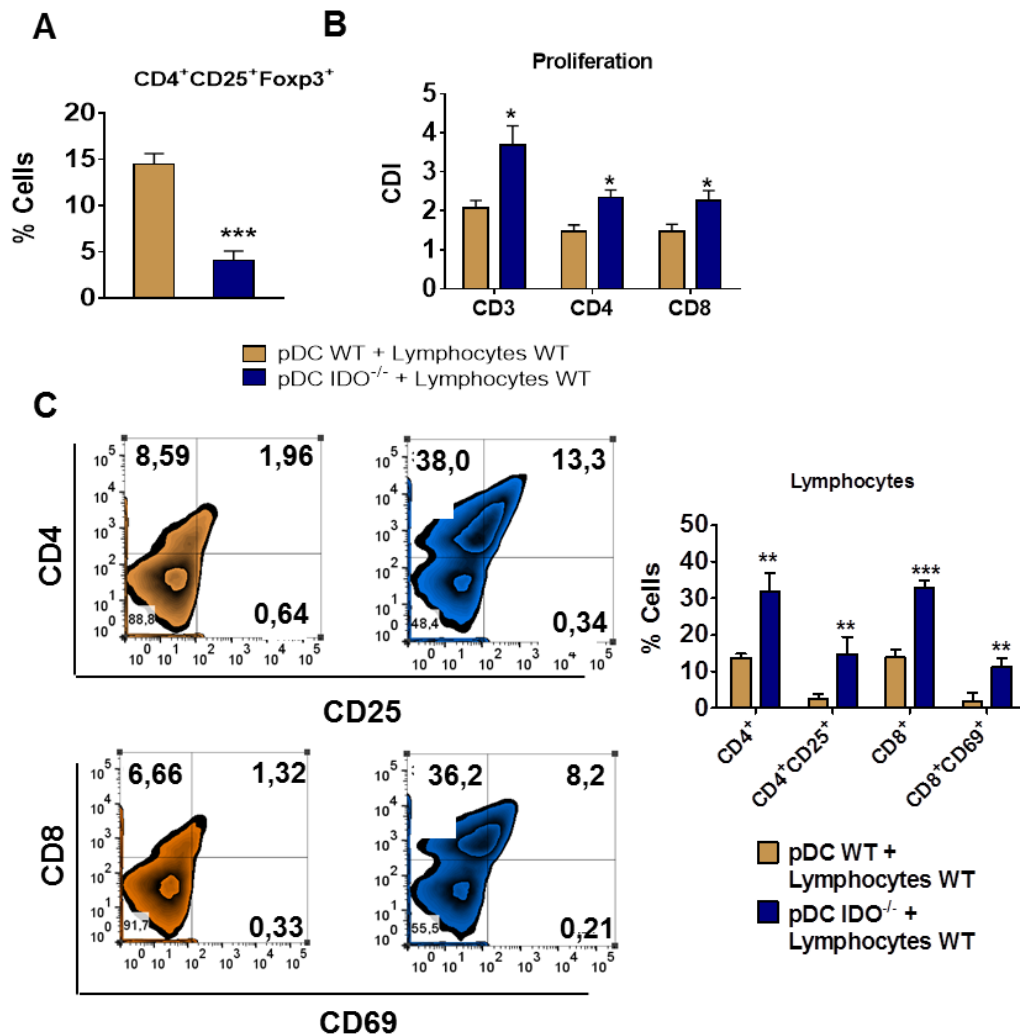

**S3 Fig. Impaired immune response promoted by pDC/Treg interactions is dependent on IDO activity.** pDCs were isolated from lung infiltrating leukocytes of uninfected IDO<sup>-/-</sup> and WT mice using magnetic beads anti-mPDCA, matured with *P. brasiliensis* yeasts (1:10; Pb:pDC ratio) and then co-cultured for 7 days with splenic CD3<sup>+</sup>lymphocytes (1:10; pDC:lymphocytes ratio) isolated by anti-CD3 magnetic beads from WT mice. (A) Frequency of CD4<sup>+</sup>Foxp3<sup>+</sup> T cells analyzed by flow cytometry after 7 days of co-cultivation. (B) Splenic lymphocytes from uninfected WT mice were previously labeled with CFSE (5 mM) and co-cultured with *P. brasiliensis* -infected pDCs. After 7 days, the cells were adjusted to 1 × 10<sup>6</sup>, labeled with specific anti-CD4 and CD8 antibodies and analyzed by flow cytometry. (C) After 7 days of co-culture with infected pDCs, lymphocytes were adjusted to 1 × 10<sup>6</sup>, labeled with specific anti-CD4, CD8, CD25, and CD69 antibodies and analyzed by flow cytometry. The lymphocytes were gated by FSC/SSC analysis and gated cells were analyzed for the expression of CD4<sup>+</sup>CD25<sup>+</sup> (top)

CD8<sup>+</sup>CD69<sup>+</sup> (bottom). Bars reflect mean  $\pm$  SD of two independent experiments with eight mice per group (right) (\*  $p < 0.05$ ).
